# Supplementary material for: Significant Association of Urinary Toxic Metals and Autism-Related Symptoms—A Nonlinear Statistical Analysis with Cross Validation
Source: PubMed Central journal article supplement (PMC5222512; doi:10.1371/journal.pone.0169526), 2017-01-09
Supplement: pone.0169526.s007.pdf [file pone.0169526.s007.pdf]

| Subject Number | Al /creat | As /creat | Cd /creat | Cs /creat | Hg /creat | Ni /creat | Pb /creat | Sn /creat | Tl /creat | W /creat |
|----------------|-----------|-----------|-----------|-----------|-----------|-----------|-----------|-----------|-----------|----------|
| 68             | 3.33      | 8.04837   | 0.17902   | 2.02038   | 0.2       | 3.63181   | 0.42196   | 0.22433   | 0.07964   | 0.30482  |
| 69             | 3.33      | 5.49932   | 0.23322   | 1.95517   | 1.014     | 2.29856   | 0.41568   | 0.13      | 0.09593   | 0.21992  |
| 70             | 3.33      | 8.51679   | 0.26636   | 3.10691   | 0.2       | 2.56239   | 0.29968   | 0.13      | 0.07149   | 0.10691  |
| 71             | 12.08868  | 13.71827  | 0.1979    | 2.50344   | 0.2       | 4.76587   | 0.32227   | 1.32299   | 0.10922   | 0.2485   |
| 72             | 6.42861   | 4.88458   | 0.20641   | 3.12727   | 0.33335   | 2.488     | 0.70752   | 0.13      | 0.08484   | 0.12829  |
| 73             | 3.33      | 1.38114   | 0.09522   | 1.47754   | 0.2       | 3.95718   | 0.5915    | 0.13      | 0.04526   | 0.30804  |
| 74             | 3.33      | 2.27673   | 0.36036   | 3.11622   | 0.31349   | 2.08307   | 0.32575   | 0.51209   | 0.22664   | 0.06956  |
| 75             | 11.08885  | 41.44383  | 0.20781   | 3.63525   | 0.6397    | 3.16908   | 0.42926   | 1.53052   | 0.08327   | 0.28922  |
| 76             | 7.0412    | 12.7652   | 0.63923   | 4.83211   | 0.3125    | 4.60703   | 0.36955   | 2.54167   | 0.07048   | 0.28873  |
| 77             | 10.96169  | 36.93132  | 0.52179   | 5.88766   | 0.59178   | 3.00243   | 0.70845   | 4.2646    | 0.09912   | 0.45079  |
| 78             | 10.79133  | 12.62281  | 0.30348   | 1.93421   | 0.2       | 3.30617   | 0.56174   | 0.59126   | 0.09042   | 0.51518  |
| 79             | 3.33      | 2.22006   | 0.12423   | 1.13438   | 0.2       | 1.24958   | 0.09549   | 0.13      | 0.05141   | 0.12401  |
| 80             | 6.96546   | 5.22715   | 0.24515   | 1.83732   | 0.2       | 2.66082   | 0.28072   | 0.24515   | 0.08155   | 0.24567  |
| 81             | 9.24671   | 16.36943  | 0.56846   | 3.90518   | 0.2       | 3.58428   | 0.18135   | 0.38955   | 0.1066    | 0.23408  |
| 82             | 3.33      | 11.06547  | 0.52801   | 4.7105    | 0.2       | 4.32964   | 0.32679   | 0.24853   | 0.068     | 0.26767  |
| 83             | 15.91917  | 7.23759   | 0.26033   | 3.3283    | 0.2       | 3.35826   | 0.47975   | 2.43726   | 0.07311   | 0.2912   |
| 84             | 7.48232   | 11.39087  | 0.43612   | 2.8673    | 0.35513   | 2.00551   | 0.07      | 1.2154    | 0.08859   | 0.27947  |
| 85             | 7.60758   | 8.98194   | 0.32467   | 6.06432   | 0.45419   | 6.00991   | 0.27665   | 0.76586   | 0.14145   | 0.51795  |
| 86             | 3.33      | 8.48717   | 0.20156   | 4.86335   | 0.2       | 3.59815   | 0.24421   | 0.54696   | 0.10909   | 0.18272  |
| 87             | 3.33      | 3.85425   | 0.18006   | 3.50655   | 0.2       | 8.53729   | 0.07      | 0.13      | 0.13578   | 0.16494  |
| 88             | 8.91813   | 11.99916  | 0.29275   | 6.98908   | 0.2       | 4.48855   | 0.61124   | 1.81912   | 0.2867    | 0.19611  |
| 89             | 3.33      | 4.00764   | 0.31495   | 2.70181   | 0.2       | 2.48562   | 0.3105    | 1.68416   | 0.16489   | 0.15214  |
| 90             | 3.33      | 1.99343   | 0.41443   | 2.58148   | 0.30382   | 1.94076   | 0.21322   | 0.74755   | 0.09099   | 1.16056  |
| 91             | 3.33      | 12.09917  | 0.24903   | 2.51246   | 0.83834   | 3.46447   | 0.22132   | 0.34576   | 0.0664    | 0.04034  |
| 92             | 3.33      | 5.19225   | 0.15794   | 1.88246   | 0.62988   | 4.54255   | 0.26418   | 0.40465   | 0.0568    | 0.12502  |
| 93             | 3.33      | 7.39322   | 0.45776   | 3.13097   | 0.56454   | 1.60474   | 0.2924    | 4.38105   | 0.11165   | 0.26837  |
| 94             | 3.33      | 6.05954   | 0.11934   | 1.64779   | 0.2       | 3.68458   | 0.12504   | 0.13      | 0.06928   | 0.06428  |
| 95             | 3.33      | 7.27671   | 0.50497   | 2.62081   | 1.39301   | 4.04317   | 0.31165   | 1.16894   | 0.06137   | 0.45776  |
| 96             | 24.73399  | 7.80689   | 0.42686   | 4.03358   | 0.98627   | 4.48936   | 0.66981   | 0.39907   | 0.08255   | 0.13801  |
| 97             | 5.45168   | 12.11831  | 0.34365   | 3.76205   | 0.75737   | 7.26069   | 0.30784   | 0.27369   | 0.08038   | 0.51737  |
| 98             | 43.52436  | 14.56682  | 0.62418   | 4.31827   | 0.12117   | 2.32452   | 0.20976   | 2.41971   | 0.10819   | 0.42403  |
| 99             | 3.33      | 4.94686   | 0.32626   | 3.34857   | 0.96043   | 1.82063   | 0.21355   | 0.42634   | 0.06694   | 0.08602  |
| 100            | 3.33      | 4.2268    | 0.21112   | 1.17669   | 0.45561   | 3.93719   | 0.11031   | 0.71323   | 0.07713   | 0.29347  |
| 101            | 3.33      | 18.85891  | 0.18542   | 3.20132   | 0.2       | 1.39231   | 0.16261   | 0.66018   | 0.17462   | 0.19679  |
| 102            | 7.58982   | 10.21478  | 0.23801   | 3.42515   | 0.89591   | 2.65849   | 0.28085   | 0.80991   | 0.0488    | 0.26925  |
| 103            | 13.96414  | 7.95378   | 0.25142   | 4.97507   | 0.61347   | 4.87498   | 0.22982   | 0.57575   | 0.15255   | 0.12612  |
| 104            | 13.45164  | 13.4527   | 0.37653   | 10.63345  | 0.2       | 3.89777   | 0.57218   | 2.87911   | 0.22535   | 0.32242  |
| 105            | 5.15714   | 8.3462    | 0.22411   | 7.23678   | 0.2       | 1.69108   | 0.21702   | 0.62817   | 0.23364   | 0.58946  |
| 106            | 3.33      | 11.21572  | 0.38286   | 2.43665   | 0.2       | 4.61295   | 0.24155   | 2.69826   | 0.07622   | 0.12496  |
| 107            | 5.73899   | 15.91424  | 1.79376   | 5.93395   | 1.06156   | 7.21807   | 0.57404   | 0.90318   | 0.16232   | 0.31073  |
| 108            | 12.62186  | 24.32236  | 0.88755   | 4.85934   | 0.56696   | 12.33914  | 0.60826   | 1.72465   | 0.12058   | 0.25921  |
| 109            | 3.33      | 16.03183  | 1.1715    | 5.37535   | 0.39504   | 8.57298   | 0.48527   | 1.02361   | 0.09637   | 0.43516  |
| 110            | 6.80746   | 12.67064  | 0.80549   | 4.25689   | 0.2       | 3.12851   | 0.40598   | 1.0381    | 0.08906   | 1.02896  |
| 111            | 7.00324   | 9.2978    | 0.54      | 3.27364   | 3.84058   | 5.23214   | 0.24624   | 0.34208   | 0.17723   | 0.15364  |
| 112            | 5.7651    | 29.48961  | 0.49253   | 5.13384   | 0.41737   | 6.28449   | 0.59058   | 1.44665   | 0.11084   | 0.47148  |
| 113            | 3.33      | 9.05984   | 0.20171   | 3.81209   | 0.40419   | 6.85101   | 0.37023   | 0.54713   | 0.1276    | 0.10574  |
| 114            | 6.43692   | 12.84875  | 0.2821    | 5.07585   | 0.2       | 3.96882   | 0.51972   | 0.49192   | 0.1556    | 0.17819  |
| 115            | 8.26415   | 7.09744   | 0.21146   | 4.3566    | 0.35229   | 1.58679   | 0.29111   | 0.30243   | 0.18652   | 0.12978  |
| 116            | 69.95514  | 7.63931   | 0.30587   | 2.88124   | 2.42423   | 3.71868   | 0.12284   | 0.31215   | 0.07708   | 0.42887  |
| 117            | 3.33      | 21.13142  | 0.43429   | 3.68775   | 0.2       | 5.20119   | 0.33755   | 0.57709   | 0.09372   | 0.26412  |
