# Supplementary material for: Significant Association of Urinary Toxic Metals and Autism-Related Symptoms—A Nonlinear Statistical Analysis with Cross Validation
Source: PubMed Central journal article supplement (PMC5222512; doi:10.1371/journal.pone.0169526), 2017-01-09
Supplement: pone.0169526.s009.pdf [file pone.0169526.s009.pdf]

| Subject Number | ABC Total | ATEC Total | PDDBI | PGIR2       | SAS | SRS   | SSP   | CARS | Pro SAS | Raw ADOS | Adj ADOS |
|----------------|-----------|------------|-------|-------------|-----|-------|-------|------|---------|----------|----------|
| 1              | 133       | 123        | 74    | 2.470588235 | 10  | 165   | 79    | 53   | 10      | 20       | 18       |
| 2              | 26        | 34         | -155  | 0.882352941 | 6   | 87    | 154   | 29.5 | 4       | 9        | 9        |
| 3              | 43        | 47         | -125  | 1.058823529 | 2.5 | 91    | 144   | 34.5 | 6       | 14       | 14       |
| 4              | 68        | 69         | -74   | 2.117647059 | 5   | 110   | 70    | 38.5 | 7       | 25       | 22       |
| 5              | 74        | 96         | -23   | 1.352941176 | 7   | 134   | 117   | 42   | 7       | 23       | 21       |
| 6              | 37        | 39         | -119  | 0.941176471 | 4   | 109   | 134   | 39   | 7       | 17       | 16       |
| 7              | 67        | 71         | -92   | 1.764705882 | 4   | 132   | 84    | 39.5 | 7       | 14       | 14       |
| 8              | 73        | 103        | 36    | 2           | 7   | 170   | 77    | 44.5 | 8       | 22       | 20       |
| 9              | 15        | 41         | -123  | 1.117647059 | 6   | 57    | 127   | 37   | 8       | 16       | 16       |
| 10             | 26        | 19         | -147  | 0.529411765 | 3   | 43    | 151   | 36   | 7       | 16       | 15       |
| 11             | 83        | 55         | -71   | 1.941176471 | 1.5 | 106   | 123   | 35.5 | 4       | 2        | 2        |
| 12             | 17        | 58         | -108  | 1.411764706 | 7   | 92    | 103   | 35   | 6       | 20       | 20       |
| 13             | 66        | 57         | -118  | 1.529411765 | 4   | 119   | 128   | 42   | 7       | 10       | 10       |
| 14             | 70        | 88         | 34    | 1.764705882 | 6   | 154   | 108   | 40   | 8       | 13       | 13       |
| 15             | 55        | 63         | -80   | 1.470588235 | 6   | 113   | 165   | 38   | 8       | 12       | 12       |
| 16             | 30        | 39         | -76   | 1.588235294 | 3   | 103   | 104   | 35.5 | 7       | 9        | 9        |
| 17             | 120       | 102        | -31   | 2           | 4.5 | 133   | 79    | 33   | 3       | 9        | 9        |
| 18             | 138       | 115        | -36   | 1.941176471 | 4   | 144   | 67    | 27.5 | 3       | 8        | 8        |
| 19             | 30        | 63         | -42   | 1.294117647 | 7   | 114   | 99    | 38.5 | 9       | 10       | 10       |
| 20             | 85        | 69         | -71   | 1.764705882 | 7   | 121   | 121   | 41   | 8       | 17       | 17       |
| 21             | 80        | 69         | -83   | 1.235294118 | 3   | 98    | 148   | 37.5 | 6       | 9        | 9        |
| 22             | 94        | 77         | -24   | 1.705882353 | 5   | 78    | 116   | 40   | 7       | 19       | 17       |
| 23             | 64.5      | 73.5       | -89   | 1.941176471 | 6   | 96    | 116   | 45   | 8       | 22       | 21       |
| 24             | 72        | 65         | 27    | 1.588235294 | 8   | 127   | 105   | 47.5 | 10      | 28       | 20       |
| 25             | 101       | 102        | -52   | 1.588235294 | 4   | 149   | 138   | 40   | 7       | 13       | 13       |
| 26             | 96        | 89         | -3    | 1.823529412 | 6   | 119   | 119   | 45.5 | 7       | 29       | 23       |
| 27             | 97        | 57         | -153  | 1.058823529 | 2   | 82.5  | 118   | 37.5 | 7       | 12       | 12       |
| 28             | 19        | 15         | -186  | 0.823529412 | 2   | 58    | 145   | 32.5 | 4       | 6        | 6        |
| 29             | 95        | 70         | -54   | 1.6875      | 4   | 129   | 126   | 38   | 5       | 15       | 15       |
| 30             | 105       | 81         | 5     | 1.647058824 | 3   | 128   | 112   | 40.5 | 6       | 11       | 11       |
| 31             | 89        | 65         | -39   | 1.235294118 | 4   | 146   | 97    | 41   | 7       | 16       | 16       |
| 32             | 141       | 124        | 21    | 2.294117647 | 4   | 161   | 73    | 39   | 6       | 15       | 15       |
| 33             | 82        | 82         | -11   | 1.941176471 | 3   | 145   | 83    | 39.5 | 6       | 10       | 10       |
| 34             | 75        | 79         | -9    | 2.235294118 | 5   | 134   | 110.4 | 49.5 | 8       | 22       | 21       |
| 35             | 129       | 103        | -21   | 2.411764706 | 6   | 154   | 76    | 42.5 | 6       | 16       | 15       |
| 36             | 78        | 62         | -80   | 1.529411765 | 4   | 125   | 97    | 52.5 | 8       | 18       | 18       |
| 37             | 80        | 100        | 4     | 1.823529412 | 8   | 139   | 101   | 51   | 9       | 19       | 18       |
| 38             | 0         | 5          | -202  | 0.411764706 | 1   | 5     | 178   | 30   | 3       | 3        | 3        |
| 39             | 72        | 39         | -114  | 1           | 3   | 116   | 123   | 32   | 6       | 6        | 6        |
| 40             | 111       | 102        | 30    | 1.882352941 | 8   | 142   | 120   | 49   | 9       | 26       | 20       |
| 41             | 69        | 53         | -107  | 1.294117647 | 3   | 77    | 110   | 36.5 | 5       | 8        | 8        |
| 42             | 93        | 86         | -7    | 2.235294118 | 10  | 133   | 109   | 44.5 | 9       | 15       | 14       |
| 43             | 59        | 93         | 3     | 1.529411765 | 3   | 120   | 109   | 38   | 8       | 18       | 18       |
| 44             | 66        | 85         | -32   | 1.705882353 | 6   | 131   | 119   | 38.5 | 6       | 7        | 7        |
| 45             | 68        | 69         | -26   | 1.882352941 | 7   | 113   | 122   | 46   | 8       | 18       | 17       |
| 46             | 108       | 139.5      | 65    | 2.941176471 | 10  | 146   | 79    | 34.5 | 3       | 20       | 13       |
| 47             | 9         | 20         | -167  | 0.823529412 | 2   | 68    | 159   | 40   | 6       | 17       | 16       |
| 48             | 25        | 39         | -124  | 0.941176471 | 2.5 | 42    | 126   | 33.5 | 4       | 8        | 8        |
| 49             | 41        | 45         | -92   | 1           | 1   | 115   | 120   | 34.5 | 4       | 9        | 9        |
| 50             | 66        | 63         | -81   | 1.176470588 | 3   | 106   | 107   | 37   | 4       | 3        | 3        |
| 51             | 45        | 42         | -92   | 1.058823529 | 3   | 97    | 136   | 33.5 | 6       | 15       | 15       |
| 52             | 18        | 65         | -73   | 1.176470588 | 5   | 70    | 158   | 35   | 6       | 19       | 14       |
| 53             | 86        | 54         | -91   | 1.588235294 | 4   | 91    | 126   | 40   | 6       | 14       | 14       |
| 54             | 42        | 48         | -122  | 1.764705882 | 3   | 106   | 113   | 41   | 6       | 15       | 15       |
| 55             | 33        | 47         | -99   | 0.823529412 | 4   | 105   | 95    | 36   | 7       | 20       | 20       |
| 56             | 21        | 45         | -120  | 1.235294118 | 4   | 92    | 129   | 45   | 9       | 18       | 17       |
| 57             | 23        | 49         | -134  | 1.352941176 | 2   | 97    | 137   | 29.5 | 3       | 6        | 6        |
| 58             | 56        | 56         | -76   | 1.588235294 | 5   | 113   | 94    | 40   | 7       | 8        | 8        |
| 59             | 97        | 100        | -14   | 2           | 3   | 136   | 103   | 45   | 7       | 19       | 16       |
| 60             | 36        | 44         | -148  | 1           | 3   | 103   | 118   | 38.5 | 6       | 10       | 10       |
| 61             | 41        | 37         | -112  | 1.647058824 | 6   | 91    | 121   | 39.5 | 6       | 16       | 15       |
| 62             | 83        | 70         | -86   | 1.764705882 | 6   | 112   | 62    | 42.5 | 7       | 15       | 15       |
| 63             | 61        | 51         | -126  | 1.235294118 | 4   | 81    | 137   | 39   | 7       | 15       | 15       |
| 64             | 104       | 63         | -99   | 1.323529412 | 1   | 115.5 | 96    | 34.5 | 4       | 5        | 5        |
| 65             | 34        | 44         | -124  | 1.117647059 | 3   | 116   | 112   | 27   | 2       | 7        | 7        |
| 66             | 35        | 42         | -173  | 1.352941176 | 3   | 94    | 124   | 31.5 | 4       | 3        | 3        |
| 67             | 52        | 49         | -96   | 1.352941176 | 2   | 57    | 147   | 37.5 | 5       | 13       | 13       |
