# Supplementary material for: Significant Association of Urinary Toxic Metals and Autism-Related Symptoms—A Nonlinear Statistical Analysis with Cross Validation
Source: PLOS journal article supplement (doi:10.1371/journal.pone.0169526), 2017-01-09
Supplement: S1 (10.1371/journal.pone.0169526.s001) [file journal.pone.0169526.s001]

Defining the concentrations of toxic metals taken from the participants on the autism spectrum and the neurotypical participants by the sets  $\mathcal{X}_1 = \{x_1(1), x_1(2), \dots, x_1(n_1)\}$  and  $\mathcal{X}_2 = \{x_2(1), x_2(2), \dots, x_2(n_2)\}$ , the mean vectors for both groups are  $\bar{x}_1 = \frac{1}{n_1} \sum_{i=1}^{n_1} x_1(i)$  and  $\bar{x}_2 = \frac{1}{n_2} \sum_{i=1}^{n_2} x_2(i)$ , respectively. The sets  $\mathcal{X}_1$  and  $\mathcal{X}_2$  have  $n_1 = 67$  and  $n_2 = 50$  samples and each sample contains the corresponding measurements of the toxic metals for a particular participant. This allows defining the between cluster variation to be defined by the matrix  $S_B = (\bar{x}_1 - \bar{x}_2)(\bar{x}_1 - \bar{x}_2)^T$ , which has the rank one. Next, the matrices  $S_{x_1} = \sum_{i=1}^{n_1} (x_1(i) - \bar{x}_1)(x_1(i) - \bar{x}_1)^T$  and  $S_{x_2} = \sum_{i=1}^{n_2} (x_2(i) - \bar{x}_2)(x_2(i) - \bar{x}_2)^T$  describe the variation of the samples of the participants on the autism spectrum and the neurotypical participants, respectively. The within variation of both sets,  $\mathcal{X}_1$  and  $\mathcal{X}_2$ , is, consequently,  $S_W = S_{x_1} + S_{x_2}$ . The objective function for linear FDA seeks to maximize the ratio of the between over the within variation of both clusters, i.e.  $J(w) = w^T S_B w / w^T S_W w$ . The solution is the eigenvector of the matrix  $S_W^{-1} S_B$ . Note that the rank of this matrix is one.
