# Supplementary material for: Significant Association of Urinary Toxic Metals and Autism-Related Symptoms—A Nonlinear Statistical Analysis with Cross Validation
Source: PLOS journal article supplement (doi:10.1371/journal.pone.0169526), 2017-01-09
Supplement: S2 (10.1371/journal.pone.0169526.s002) [file journal.pone.0169526.s002]

KFDA carries out a nonlinear transformation of the random vector  $x$  into the feature space, producing  $f = \psi(x)$ , where the dimension of  $f$  is usually much higher than that of  $x$ . Instead of constructing the matrices  $S_B$  and  $S_W$  from the original random vector  $x$ , KFDA relies on the nonlinearly transformed vector  $f$ . The corresponding matrices describing the between and within variation of  $\mathcal{F}_1 = \{f_1(1) = \psi(x_1(1)), f_1(2) = \psi(x_1(2)), \dots, f_1(n_1) = \psi(x_1(n_1))\}$  and  $\mathcal{F}_2 = \{f_2(1) = \psi(x_2(1)), f_2(2) = \psi(x_2(2)), \dots, f_2(n_2) = \psi(x_2(n_2))\}$  are  $S_B^f = (\bar{f}_1 - \bar{f}_2)(\bar{f}_1 - \bar{f}_2)^T$  and  $S_W^f = S_{f_1} + S_{f_2}$ . Here,  $\bar{f}_1 = \frac{1}{n_1} \sum_{i=1}^{n_1} \psi(x_1(i))$ ,  $\bar{f}_2 = \frac{1}{n_2} \sum_{i=1}^{n_2} \psi(x_2(i))$ ,  $S_{f_1} = \sum_{i=1}^{n_1} (\psi(x_1(i)) - \bar{f}_1)(\psi(x_1(i)) - \bar{f}_1)^T$  and  $S_{f_2} = \sum_{i=1}^{n_2} (\psi(x_2(i)) - \bar{f}_2)(\psi(x_2(i)) - \bar{f}_2)^T$ . The nonlinear transformation  $f = \psi(x)$  is usually not known, however, [61] showed how to utilize scalar products  $\psi(x(i)) \cdot \psi(x(j))$ , which can be expressed by Mercer kernels  $k(x(i), x(j)) = \psi(x(i)) \cdot \psi(x(j))$ . Mercer kernels include Gaussian RBF,  $k(x(i), x(j)) = \exp(\|x(i) - x(j)\|/c)$ , or polynomial kernels,  $k(x(i), x(j)) = (x(i) \cdot x(j))^d$ , where  $\|\cdot\|$  is the squared norm of a vector, and  $c$  and  $d$  are positive parameters. In this work, we used Gaussian RBF kernels and selected the parameter  $c$  using cross validation, as advocated by [81] for kernel based classification problems.

Following from the theory of reproducing kernels, the solution for the objective function  $J(w) = (w^T S_B^f w) / (w^T S_W^f w)$  can be expressed as a function of the nonlinearly transformed samples, i.e.  $w = \sum_{i=1}^n \alpha_i \phi(x(i))$ . This implies that  $w^T \bar{f}_1$  can be written as  $\frac{1}{n_1} \sum_{i=1}^n \alpha_i \sum_{j=1}^{n_1} k(x(i), x_1(j))$ , where the  $i$ th element is  $\alpha_i \cdot \frac{1}{n_1} \sum_{j=1}^{n_1} k(x(i), x_1(j)) = \alpha_i m_{1i}$ . Expressing the sums  $w^T \bar{f}_1 = \sum_{i=1}^n \alpha_i m_{1i}$  and  $w^T \bar{f}_2 = \frac{1}{n_2} \sum_{i=1}^n \alpha_i \sum_{j=1}^{n_2} k(x(i), x_2(j)) = \sum_{i=1}^n \alpha_i m_{2i}$  as a scalar product yields  $\alpha^T m_1$  and  $\alpha^T m_2$ , so that the numerator of the objective function  $J(w)$ ,  $w^T S_B^f w$ , becomes  $\alpha^T M \alpha$ , where  $M = (m_1 - m_2)(m_1 - m_2)^T$ . Analogously, the denominator of  $J(w)$ ,  $w^T S_W^f w$  can be written as  $\alpha^T N \alpha$ . The construction of  $N$  follows from the definition of  $w^T S_{f_1} w$  and  $w^T S_{f_2} w$ . Substituting  $w = \sum_{i=1}^n \alpha_i \psi(x(i))$  into  $w^T S_{f_1} w$  gives rise to  $\alpha^T K_1 [I_{n_1} - 1_{n_1}] K_1^T \alpha$ , where  $K_1$  is a matrix of dimension  $n$  times  $n_1$  for which  $k(x(i), x_1(j))$  is the element in the  $i$ th row and  $j$ th column,  $I_{n_1}$  is the identify matrix of dimension  $n_1$  and  $1_{n_1}$  is a matrix for which each element is  $1/n_1$ . Analogously,  $w^T S_{f_2} w = \alpha^T K_2 [I_{n_2} - 1_{n_2}] K_2^T \alpha$ , where  $K_2$  is a  $n$  by  $n_2$  matrix that has  $k(x(i), x_2(j))$  as the element in the  $i$ th row and  $j$ th column. The matrices  $I_{n_2}$  and  $1_{n_2}$  are the identify matrix of dimension  $n_2$  and a matrix for which every entry is  $1/n_2$ , respectively. Hence,  $N = K_1 [I_{n_1} - 1_{n_1}] K_1^T + K_2 [I_{n_2} - 1_{n_2}] K_2^T$ . The optimal solution for  $\alpha$  is given by the eigenvector of the matrix  $N^{-1}M$ . Caution is required here, since the rank of  $N$  is less than  $n$  [61]. This can be overcome by utilizing a regularization parameter of the generalized inverse. The results presented in this article relied on the use of the generalized inverse.

## References

- [61] Hsu CW, Chang CC, Lin CJ. A practical guide to support vector classification. Department of Computer Science, National Taiwan University; 2003. Available from: <http://www.csie.ntu.edu.tw/~cjlin/papers/guide/guide.pdf>
- [81] Mika S, Ratsch G, Weston J, Scholkopf B, Muller KR. Fisher Discriminant Analysis with Kernels. In: Proceedings of the Neural Networks for Signal Processing IX Workshop; 1999. p. 41–48
